# Supplementary material for: Improved vectors for retron-mediated CRISPR-Cas9 genome editing in Saccharomyces cerevisiae
Source: PubMed Central journal article supplement (PMC11326209; doi:10.1101/2024.08.06.606807), 2024-08-07
Supplement: NIHPP2024.08.06.606807v1-supplement-2.pdf [file NIHPP2024.08.06.606807v1-supplement-2.pdf]

## Supplemental Figures

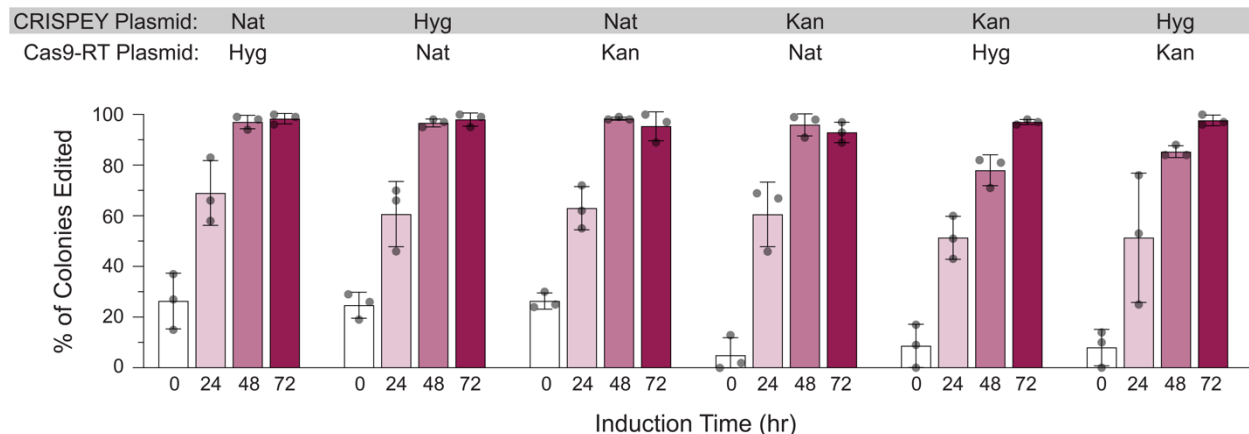

**Supplemental Figure 1. The choice selectable marker has a small effect on editing efficiency with the estradiol-inducible CRISPEY system.** Cells were transformed with  $\beta$ -estradiol-inducible pCas9-EcRT-Z3 and pCRISPEY-Z3-ADE2 plasmids containing the denoted antibiotic resistance markers. Cells were passaged for the indicated amount of time on  $\beta$ -estradiol-containing selective media and then plated onto YPD to score editing efficiency. Error bars denote the mean and standard deviation of biological triplicates.

### Improved vectors for yeast genome editing

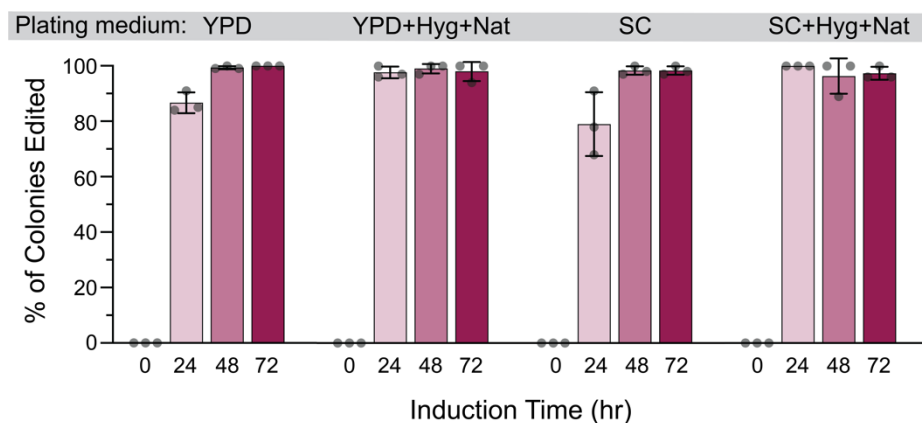

**Supplemental Figure 2. Plating medium has little effect on editing efficiency.** Cells were transformed with galactose-inducible pCas9-EcRT-GAL and pCRISPEY-GAL-ADE2 plasmids containing the denoted antibiotic resistance markers. Cells were passaged for the indicated amount of time on galactose-containing selective media and then plated onto either non-selective (YPD or SC) media or selective media (YPD or SC plus antibiotics) as indicated to score editing efficiency. Error bars denote the mean and standard deviation of biological triplicates.

## Supplemental Tables

**Table S1: Reagent, media and chemicals used in this study.**

| Item                                                    | Source              | Catalog #   |
|---------------------------------------------------------|---------------------|-------------|
| <b>Growth media and components</b>                      |                     |             |
| Agar                                                    | Fisher              | BP1423-500  |
| Dextrose (glucose)                                      | Fisher              | BP350-1     |
| Galactose                                               | Fisher              | AC150615000 |
| Monosodium glutamate (L-glutamic acid; MSG)             | Fisher              | 501804313   |
| Peptone (Bacto)                                         | Fisher              | DF0118-17-0 |
| Raffinose                                               | Fisher              | AAA1831318  |
| Sodium chloride                                         | Fisher              | BP358-10    |
| Tryptone                                                | Fisher              | BP1421-500  |
| Yeast extract (Bacto)                                   | Fisher              | DF0127-17-9 |
| Yeast nitrogen base w/o amino acids or ammonium sulfate | VWR                 | 90002-646   |
| <b>Enzymes</b>                                          |                     |             |
| BamHI FastDigest restriction enzyme                     | Fisher              | FERFD0054   |
| BglII FastDigest restriction enzyme                     | Fisher              | FERFD0083   |
| DpnI FastDigest restriction enzyme                      | Fisher              | FERFD1704   |
| Eco91I FastDigest restriction enzyme                    | Fisher              | FERFD0394   |
| EcoRI FastDigest restriction enzyme                     | Fisher              | FERFD0274   |
| Mph1103I FastDigest restriction enzyme                  | Fisher              | FERFD0734   |
| MssI FastDigest restriction enzyme                      | Fisher              | FERFD1344   |
| NotI FastDigest restriction enzyme                      | Fisher              | FERFD0595   |
| OliI FastDigest restriction enzyme                      | Fisher              | FERFD1634   |
| PfoI FastDigest restriction enzyme                      | Fisher              | FERFD1754   |
| PvuII FastDigest restriction enzyme                     | Fisher              | FERFD0634   |
| SacI FastDigest restriction enzyme                      | Fisher              | FERFD1134   |
| XhoI FastDigest restriction enzyme                      | Fisher              | FERFD0694   |
| CloneAmp™ HiFi PCR Premix                               | Takara              | 639298      |
| Herculase II Fusion DNA Polymerase                      | Agilent             | 600675      |
| KOD Hotstart DNA polymerase                             | VWR                 | 80511-384   |
| Taq Buffer (5x GoTaq)                                   | Fisher              | PRM7911     |
| T4 DNA Ligase with 50% PEG4000                          | Fisher              | EL0014      |
| T4 DNA polymerase with NEB Buffer 2.1                   | NEB                 | M0203S      |
| <b>Kits</b>                                             |                     |             |
| DNA clean & concentrator-5 kit                          | Zymo Research       | D4013       |
| In-Fusion® HD cloning kit                               | Takara              | 638909      |
| NEBuilder® HiFi DNA Assembly cloning kit                | New England Biolabs | E5520S      |
| Wizard® Plus Miniprep DNA purification kit              | Promega             | A1460       |
| Zymoclean DNA recovery kit                              | Zymo Research       | D4007       |
| <b>Chemicals</b>                                        |                     |             |
| Ampicillin                                              | Sigma-Aldrich       | A9518       |
| dNTP mix                                                | VWR                 | 95057-676   |
| G418                                                    | Gold Biotechnology  | G-418-10    |
| Hygromycin B                                            | Gold Biotechnology  | H-270-5     |
| Lithium acetate                                         | Fisher              | AAA1792130  |
| Nourseothricin Sulfate (ClonNat)                        | Gold Biotechnology  | N-500-1     |
| Polyethylene glycol 3350                                | VWR                 | JTU221-8    |
| β-estradiol                                             | VWR                 | 76204-050   |
| Nuclease-free water                                     | IDT                 | 11-05-01-14 |
| Salmon sperm DNA (used to make carrier DNA)             | Fisher              | NC0448132   |

**Table S2: Primers used in this study.**

| Primer Name                                                                                                                                                                                                                   | Sequence (5' - 3')                                                                |
|-------------------------------------------------------------------------------------------------------------------------------------------------------------------------------------------------------------------------------|-----------------------------------------------------------------------------------|
| <b><i>Amplifies MAT alleles to determine yeast mating type (Illuxley et al, 1990)</i></b>                                                                                                                                     |                                                                                   |
| MAT_a_forward                                                                                                                                                                                                                 | ACT CCA CTT CAA GTA AGA GTT TG                                                    |
| MAT_alpha_forward                                                                                                                                                                                                             | GCA CGG AAT ATG GGA CTA CTT CG                                                    |
| MAT_reverse_downstream                                                                                                                                                                                                        | AGT CAC ATC AAG ATC GTT TAT GG                                                    |
| <b><i>Amplifies Ec86-RT and SpCas9 for insertion into PfoI-Mph1103I-digested pAG26 by In-Fusion cloning to create the pCas9-EcRT-GAL-Hyg plasmid (this study)</i></b>                                                         |                                                                                   |
| Cas9-RT-pAG26_PfoI_F                                                                                                                                                                                                          | ACA TGC AGC TCC CGG ATG AAA TTA AAG CCT TCG AGC GTC                               |
| Cas9-RT-pAG26_Mph1103I_R                                                                                                                                                                                                      | TGA GTT TAG TAT ACA TGC ATG CGA ATT GCA TAT CTT TCC ATA G                         |
| <b><i>Amplifies any MX cassette for swapping markers by homologous recombination (Goldstein &amp; McCusker, 1999)</i></b>                                                                                                     |                                                                                   |
| PR78 (TEF-F)                                                                                                                                                                                                                  | CCT TGA CAG TCT TGA CGT GC                                                        |
| PR78 (TEF-R)                                                                                                                                                                                                                  | CGC ACT TAA CTT CGC ATC TG                                                        |
| <b><i>Amplifies Z3 promoter for insertion into pCas9-EcRT-GAL plasmids, to replace GAL promoter (this study)</i></b>                                                                                                          |                                                                                   |
| Z3pr_CAS_Ins_F                                                                                                                                                                                                                | TTT ATA TTG AAT TTA TAT TGA ATT TTC AAA AAT TCT TAC TTT TTT<br>TTT GGA TGG ACG    |
| Z3pr_CAS_Ins_R                                                                                                                                                                                                                | GGA TCC ACT AGT TTA TAG TTT TTT CTC CTT GAC GTT AAA GTA<br>TAG AGG TAT ATT AAC AA |
| <b><i>Amplifies pCas9-EcRT-GAL vectors lacking GAL promoter for Gibson cloning to replace GAL with Z3 promoter (this study)</i></b>                                                                                           |                                                                                   |
| Z3pr_CAS_VF                                                                                                                                                                                                                   | GAA AAA ACT ATA AAC TAG TGG ATC CCC CGG GAA AAA AAT GG                            |
| Z3pr_CAS_VR                                                                                                                                                                                                                   | AAA TTC AAT ATA AAT TCA ATA TAA ATG CCA CCA AAG AAG AAA<br>AGAAAG                 |
| <b><i>Amplifies the Z3EV transcription factor with its ACT1 promoter and 3'UTR for insertion into Mph1103I sites of pCas9-EcRT-Z3pr intermediate plasmids to create final pCas9-EcRT-Z3 plasmids (this study)</i></b>         |                                                                                   |
| Z3TF_CAS_Ins_F                                                                                                                                                                                                                | TTG TGA GTT TAG TAT ACA TGC ATG CGT CGA TCT CCC CTC AAG                           |
| Z3TF_CAS_Ins_R                                                                                                                                                                                                                | AGA TAT GCA ATT CGC ATG CAT CCC TTT AAA AAC ATA TGC CTC<br>ACC C                  |
| <b><i>Oligo used for Gibson cloning into pCRISPEY-GAL plasmids to swap unique cloning site to XhoI (this study)</i></b>                                                                                                       |                                                                                   |
| XhoI_swap_CRISPEY                                                                                                                                                                                                             | GAG TTA CTG TCT GTT TTC CTC TCG AGG TTT CAG ACG TAT GCT<br>GGAA                   |
| <b><i>Amplifies the XhoI-swapped intermediates of pCRISPEY-GAL plasmids without their GAL promoters for Gibson cloning to insert Z3 promoter and Z3EV transcription factor, creating pCRISPEY-Z3 vectors (this study)</i></b> |                                                                                   |
| Z3_CRISP_VF                                                                                                                                                                                                                   | AAA AAC TAT AAG GGT GCG CAT CTG ATG AG                                            |
| Z3_CRISP_VR                                                                                                                                                                                                                   | CGA CGC GAG CGA GCA AAA GGC CAG CAA AAG G                                         |
| <b><i>Amplifies the Z3 promoter and Z3EV transcription factor for insertion into the XhoI-swapped intermediates of pCRISPEY-GAL plasmids by Gibson cloning, creating pCRISPEY-Z3 vectors (this study)</i></b>                 |                                                                                   |
| Z3_CRISP_Ins_F                                                                                                                                                                                                                | CCT TTT GCT CGC TCG CGT CGA TCT CCC                                               |
| Z3_CRISP_Ins_R                                                                                                                                                                                                                | TGC GCA CCC TTA TAG TTT TTT CTC CTT GAC GTT AAA GTA TAG<br>AGG TAT ATT AAC AA     |

Improved vectors for yeast genome editing

| <b>Amplifies gRNA and repair template for Gibson cloning into any pCRISPEY vector (this study)</b>                                                                                  |                                                                                                                                                                                                                  |
|-------------------------------------------------------------------------------------------------------------------------------------------------------------------------------------|------------------------------------------------------------------------------------------------------------------------------------------------------------------------------------------------------------------|
| CRISPEY_F                                                                                                                                                                           | CGG CAT CCT GCA TTG AAT CTG AGT TAC TGT CTG TTT TCC<br>TGG GTC ACG CGT AGG A                                                                                                                                     |
| CRISPEY_R                                                                                                                                                                           | ATT TCAACT TGC TAT GCT GTT TCC AGC ATA GCT CTG AAA C                                                                                                                                                             |
| <b>Sequences gRNA and repair template of any pCRISPEY vector (this study)</b>                                                                                                       |                                                                                                                                                                                                                  |
| CRISPEY Retron SEQ F                                                                                                                                                                | GCA TCT GAT GAG TCC GTG AG                                                                                                                                                                                       |
| <b>Oligo templates for amplifying specific gRNAs and repair templates to be cloned into any pCRISPEY vector (this study). Repair templates are italicized and gRNAs are bolded.</b> |                                                                                                                                                                                                                  |
| ADE2_pos450_CRISPR                                                                                                                                                                  | GGGTCACGCGTAGGAGGGTTTTCCATTTCGTTGAAGTCGAGGAC<br>TTTGGCATAACGATGGAAGAGCGTAACTTCGTTGTAAAGAATAAGGA<br>AATGATTCCGGAAGCTTTGGAAGTAAGGAAACCCGTTTCTTCTGAC<br>GTAAGGGTGCGCAACTTTGGCATAACGATGGAAGTTTCAGAGCTA<br>TGCTGGAA   |
| ADE2_pos444_CRISPR                                                                                                                                                                  | GGGTCACGCGTAGGAAGATTTGGGTTTTCCATTTCGTTGAAGTCG<br>AGGACTTTGGCATAACGATGCGAAGAGGTAACCTTCGTTGTAAAGAAT<br>AAGGAAATGATTCCGGAAGCTTTGAGGAAACCCGTTTCTTCTGACG<br>TAAGGGTGCGCATCGAGGACTTTGGCATAACGATTTTCAGAGCTAT<br>GCTGGAA |
| CAN1_pos786_CRISPR                                                                                                                                                                  | GGGTCACGCGTAGGAGGTTACCGGCCAGTTGGATTCCGTTATTG<br>GAGAAACCCAGGTGCCTGGGCGTCCAGGTATAATATCTAAGGATAA<br>AAACGAAGGGAGGTTCTTAGGTTGGAGGAAACCCGTTTCTTCTGA<br>CGTAAGGGTGCGCATGGAGAAACCCAGGTGCCTGTTTCAGAGC<br>TATGCTGGAA     |
| FLO8_164_CRISPR                                                                                                                                                                     | GGGTCACGCGTAGGAGAATAGTGAACAGCAGCGACAACAACAGCA<br>GCAGCAGCAACAGCAGCAACATAGAGACAAAGGCCAAAACCCAGT<br>CGACGGACCCAAATCTAAAGAAAACAGGAAACCCGTTTCTTCTGAC<br>GTAAGGGTGCGCAGTGGATAAATCAACCTACGGTTTCAGAGCTA<br>TGCTGGAA     |
| His3delta1_315_CRISPR                                                                                                                                                               | GGGTCACGCGTAGGACATAGACGACCATCACACCACTGAAGACTG<br>CGGGATTGCTCTCGGTCAAGCTTTGCAGAGGCTAGCAGAATTACC<br>CTCCACGTTGATTGTCTGCGAGGCAAGGAAACCCGTTTCTTCTGA<br>CGTAAGGGTGCGCAGAGGCCCTAGGGGCCGTGCGGTTTCAGAGC<br>TATGCTGGAA    |
| HO_CRISPEY_Del                                                                                                                                                                      | GGGTCACGCGTAGGAATGCTTTCTGAAAACACGACTATTCTGATGG<br>CTAACGGTGAATTAAGAGCGGGCCTCATAAGAGTTGTGGTAACA<br>ACGCAGGTGCGCGCATCTGCTAAAGGAAACCCGTTTCTTCTGACG<br>TAAGGGTGCGCAGACGACCAGGTCAGCTAGGGGTTTCAGAGCTAT<br>GCTGGAA      |
| LEU2_CRISPEY_KO                                                                                                                                                                     | GGGTCACGCGTAGGATTTACATTTTCAGCAATATATATATATATTTCA<br>AGGATATACCATTTCTAAAAGATTCTCTTTTTTATGATATTTGTACATA<br>AACTTTATAAATGAAATAGGAAACCCGTTTCTTCTGACGTAAGGGTG<br>CGCAATTATGGAGAAAACTGTGGTTTCAGAGCTATGCTGGAA           |
| TPS1_KO-#3                                                                                                                                                                          | GGGTCACGCGTAGGACAGGCTAACAAACTAGGTACTCACATACAG<br>ACTTATTAAGACATAGAACTTGAACCCGATGCAAATGAGACGATCGT<br>CTATTCCTGGTCCGTTTTCTCTAGGAAACCCGTTTCTTCTGACGT<br>AAGGGTGCGCATTTCCGGAACCAACATCAAAGTTTCAGAGCTATG<br>CTGGAA     |

**Table S3: PCR conditions for all amplifications from this study.**

| Component                                                                                                                                                      | Concentration    | # of cycles | Condition                                         |
|----------------------------------------------------------------------------------------------------------------------------------------------------------------|------------------|-------------|---------------------------------------------------|
| <b><i>Amplification of MAT alleles to determine yeast mating type (Illuxley et al, 1990)</i></b>                                                               |                  |             |                                                   |
| Taq Buffer (5x)                                                                                                                                                | 4 $\mu$ l        | 1           | 95°C for 2 min                                    |
| dNTPs                                                                                                                                                          | 200 $\mu$ M each | 30          | 95°C for 30 sec                                   |
| Mat_a OR Mat_alpha F primer                                                                                                                                    | 0.5 $\mu$ M      |             | 55°C for 45 sec                                   |
| MAT_reverse_downstream primer                                                                                                                                  | 0.5 $\mu$ M      |             | 72°C for 1 min                                    |
| Genomic DNA template                                                                                                                                           | 1 $\mu$ l        | 1           | 72°C for 5 min                                    |
| Taq polymerase                                                                                                                                                 | 0.4 $\mu$ l      |             |                                                   |
| Nuclease-free water                                                                                                                                            | to 20 $\mu$ l    |             |                                                   |
| <b><i>Amplification of Ec86-RT and SpCas9 for insertion into PfoI-Mph1103I-digested pAG26 to create the pCas9-EcRT-GAL-Hyg plasmid (this study)</i></b>        |                  |             |                                                   |
| Herculase II reaction buffer (5x)                                                                                                                              | 5 $\mu$ l        | 1           | 95°C for 2 min                                    |
| dNTPs                                                                                                                                                          | 250 $\mu$ M each | 30          | 95°C for 20 sec                                   |
| Cas9-RT-pAG26_PfoI_F primer                                                                                                                                    | 0.25 $\mu$ M     |             | 53°C for 20 sec                                   |
| Cas9-RT-pAG26_Mph1103I_R primer                                                                                                                                | 0.25 $\mu$ M     |             | 72°C for 3 min 10 sec                             |
| pZS157 DNA                                                                                                                                                     | 30 ng            | 1           | 72°C for 3 min                                    |
| Herculase II polymerase                                                                                                                                        | 0.25 $\mu$ l     |             |                                                   |
| Nuclease-free water                                                                                                                                            | to 25 $\mu$ l    |             |                                                   |
| <b><i>Amplification of MX cassettes (KanMX, HygMX, NatMX) for swapping antibiotic markers by homologous recombination (Goldstein &amp; McCusker, 1999)</i></b> |                  |             |                                                   |
| KOD reaction buffer (10x)                                                                                                                                      | 5 $\mu$ l        | 1           | 95°C for 2 min                                    |
| dNTPs                                                                                                                                                          | 200 $\mu$ M each | 40          | 95°C for 20 sec                                   |
| MgSO <sub>4</sub>                                                                                                                                              | 1.5 mM           |             | 50°C for 10 sec                                   |
| PR78 (TEF-F) primer                                                                                                                                            | 0.3 $\mu$ M      |             | 70°C for 1 min                                    |
| PR79 (TEF-R) primer                                                                                                                                            | 0.3 $\mu$ M      | 1           | 72°C for 5 min                                    |
| Genomic DNA template                                                                                                                                           | 1 $\mu$ l        |             |                                                   |
| KOD Hot Start DNA polymerase                                                                                                                                   | 1 $\mu$ l        |             |                                                   |
| Nuclease-free water                                                                                                                                            | to 50 $\mu$ l    |             |                                                   |
| <b><i>Amplification of Z3 promoter for Gibson insertion into pCas9-EcRT-GAL plasmids to replace GAL promoter (this study)</i></b>                              |                  |             |                                                   |
| CloneAmp™ HiFi premix (2x)                                                                                                                                     | 10 $\mu$ l       | 1           | 98°C for 1 min                                    |
| Z3pr_CAS_Ins_F primer                                                                                                                                          | 0.3 $\mu$ M      | 35          | 98°C for 10 sec                                   |
| Z3pr_CAS_Ins_R primer                                                                                                                                          | 0.3 $\mu$ M      |             | 55°C for 15 sec                                   |
| pRS416-yZ3EV-Z3pr DNA                                                                                                                                          | 60 ng            |             | 72°C for 1 min                                    |
| Nuclease-free water                                                                                                                                            | to 20 $\mu$ l    | 1           | 72°C for 5 min                                    |
| <b><i>Amplification of pCas9-EcRT-GAL vectors lacking GAL promoter for Gibson cloning to replace GAL with Z3 promoter (this study)</i></b>                     |                  |             |                                                   |
| Herculase II reaction buffer (5x)                                                                                                                              | 4 $\mu$ l        | 1           | 95°C for 2 min                                    |
| dNTPs                                                                                                                                                          | 250 $\mu$ M each | 10          | 95°C for 15 sec                                   |
| Z3pr_CAS_VF primer                                                                                                                                             | 0.25 $\mu$ M     |             | 55°C for 20 sec                                   |
| Z3pr_CAS_VR primer                                                                                                                                             | 0.25 $\mu$ M     |             | 68°C for 5 min 30 sec                             |
| pCas9-EcRT-GAL plasmid DNA                                                                                                                                     | 60 ng            | 20          | 95°C for 15 sec                                   |
| Herculase II polymerase                                                                                                                                        | 1 $\mu$ l        |             | 55°C for 20 sec                                   |
| Nuclease-free water                                                                                                                                            | to 20 $\mu$ l    |             | 68°C for 5 min 30 sec<br>(increasing 20sec/cycle) |

Improved vectors for yeast genome editing

|                                                                                                                                                                                                                                      |             |    |                                                   |
|--------------------------------------------------------------------------------------------------------------------------------------------------------------------------------------------------------------------------------------|-------------|----|---------------------------------------------------|
|                                                                                                                                                                                                                                      |             | 1  | 72°C for 8 min                                    |
| <b><i>Amplification of the Z3EV transcription factor with its ACT1 promoter and 3'UTR for insertion into Mph1103I sites of pCas9-EcRT-Z3pr intermediate plasmids to create final pCas9-EcRT-Z3 plasmids (this study)</i></b>         |             |    |                                                   |
| CloneAmp™ HiFi premix (2x)                                                                                                                                                                                                           | 20 µl       | 1  | 98°C for 1 min                                    |
| Z3TF_CAS_Ins_F primer                                                                                                                                                                                                                | 0.3 µM      | 35 | 98°C for 10 sec                                   |
| Z3TF_CAS_Ins_R primer                                                                                                                                                                                                                | 0.3 µM      |    | 55°C for 15 sec                                   |
| pRS416-yZ3EV-Z3pr DNA                                                                                                                                                                                                                | 100 ng      |    | 72°C for 2 min                                    |
| Nuclease-free water                                                                                                                                                                                                                  | to 40 µl    | 1  | 72°C for 5 min                                    |
| <b><i>Amplification of the XhoI-swapped intermediates of pCRISPEY-GAL plasmids without their GAL promoters for Gibson cloning to insert Z3 promoter and Z3EV transcription factor, creating pCRISPEY-Z3 vectors (this study)</i></b> |             |    |                                                   |
| Herculase II reaction buffer (5x)                                                                                                                                                                                                    | 4 µl        | 1  | 95°C for 2 min                                    |
| dNTPs                                                                                                                                                                                                                                | 250 µM each | 10 | 95°C for 15 sec                                   |
| Z3_CRISP_VF primer                                                                                                                                                                                                                   | 0.5 µM      |    | 65°C for 20 sec                                   |
| Z3_CRISP_VR primer                                                                                                                                                                                                                   | 0.5 µM      |    | 68°C for 5 min 30 sec                             |
| pCRISPEY-GAL(XhoI) DNA                                                                                                                                                                                                               | 50 ng       | 20 | 95°C for 15 sec                                   |
| Herculase II polymerase                                                                                                                                                                                                              | 1 µl        |    | 65°C for 20 sec                                   |
| Nuclease-free water                                                                                                                                                                                                                  | to 20 µl    |    | 68°C for 5 min 30 sec<br>(increasing 20sec/cycle) |
|                                                                                                                                                                                                                                      |             | 1  | 72°C for 8 min                                    |
| <b><i>Amplification of the Z3 promoter and Z3EV transcription factor for insertion into the XhoI-swapped intermediates of pCRISPEY-GAL plasmids by Gibson cloning, creating pCRISPEY-Z3 vectors (this study)</i></b>                 |             |    |                                                   |
| CloneAmp™ HiFi premix (2x)                                                                                                                                                                                                           | 20 µl       | 1  | 98°C for 1 min                                    |
| Z3_CRISP_Ins_F primer                                                                                                                                                                                                                | 0.25 µM     | 35 | 98°C for 10 sec                                   |
| Z3_CRISP_Ins_R primer                                                                                                                                                                                                                | 0.25 µM     |    | 60°C for 15 sec                                   |
| pRS416-yZ3EV-Z3pr DNA                                                                                                                                                                                                                | 100 ng      |    | 72°C for 1 min                                    |
| Nuclease-free water                                                                                                                                                                                                                  | to 40 µl    | 1  | 72°C for 5 min                                    |
| <b><i>Amplifies gRNA and repair template for Gibson cloning into any pCRISPEY vector (this study)</i></b>                                                                                                                            |             |    |                                                   |
| CloneAmp™ HiFi premix (2x)                                                                                                                                                                                                           | 20 µl       | 1  | 98°C for 1 min                                    |
| CRISPEY_F primer                                                                                                                                                                                                                     | 0.3 µM      | 35 | 98°C for 10 sec                                   |
| CRISPEY_R primer                                                                                                                                                                                                                     | 0.3 µM      |    | 55°C for 15 sec                                   |
| gRNA/repair template oligo                                                                                                                                                                                                           | 100 ng      |    | 72°C for 1 min                                    |
| Nuclease-free water                                                                                                                                                                                                                  | to 40 µl    | 1  | 72°C for 5 min                                    |
